# Supplementary material for: Characterization of Hantavirus N Protein Intracellular Dynamics and Localization
Source: MDPI journal article supplement (doi:10.3390/v14030457), 2022-02-23

Plasmid Map

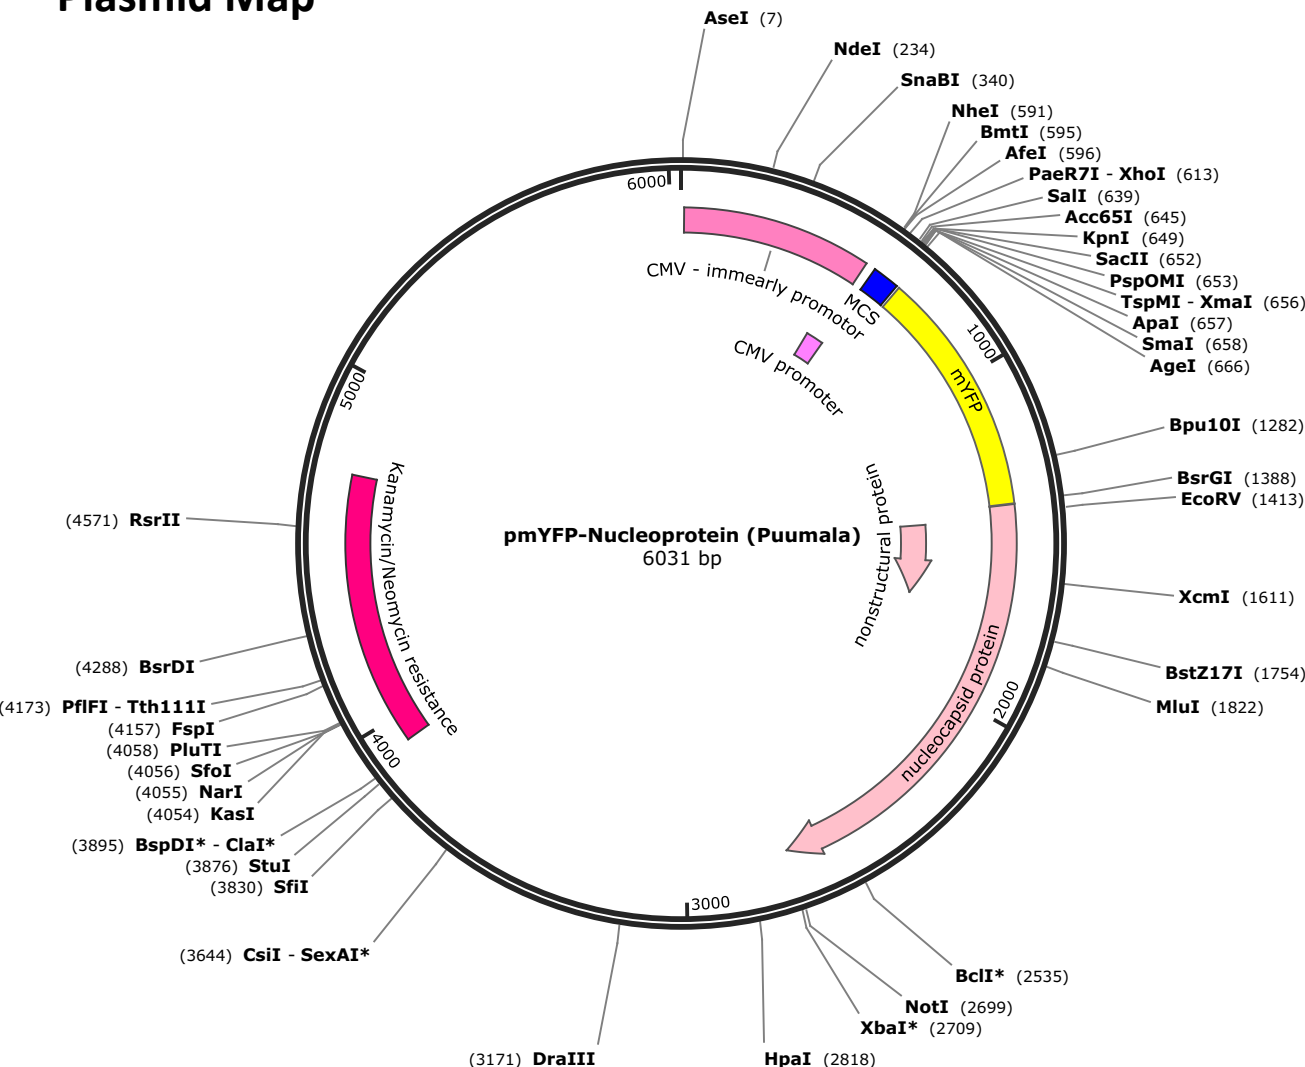

Primary Sequence.

MVSKGEELFTGVVPILVELDGDVNGHKFSVSGEGEDATYGKLTCLKICTTGKLPVPWPTLVTTFGYGLQCFA  
RYPDHMKQHDFFKSAMPEGYVQERTIFFKDDGNYKTRAEVKFEGDTLVNRIELKGIDFKEDGNILGHKLEYN  
YNSHNVYIMADKQKNGIKVNFKIRHNIEDGSQLADHYQQNTPIGDGPVLLPDNHLYLSYQSKLSKDPNEKRD  
HMLVLEFVTAAGITLGMDELYKIMSDLTDIQEDITRHEQQLIVARQKLKDAERAVEVDPDDVNKNTLQARQQ  
TVSALEDKLADYKRRMADAVSRKKMDTKPTDPTGIEPDDHLKERSRLRYGNVLDVNAIDIEEPSGQTADWYT  
IGVYVIGFTLPIILKALYMLSTRGRQTVKENKGTRIRFKDDTSFEDINGIRRPKHLYVSMPTAQSTMKAELTPG  
RFRTIVCGLFPTQIQVRNIMSPVMGVIGFSFFVKDWSEIRREFMEKECPFIKPEVKPGTPAQEIEMLKRNKIYF  
MQRQDVLVDKNHVADIDKLIDYAASGDPTSPDNIDSPNAPVWFACAPDRCPPTCIYVAGMAELGAFFSILQD  
MRNTIMASKVTGTAEEKLKKSSFYQSYLRRTQSMGIQLDQRIILLFMLEWKGEMVDHFHGLGDDMDPELRG  
LAQALIDQKVKEISNQEPLKI\*

mYFPSpacerN protein

Construct Schematics

YFP-N

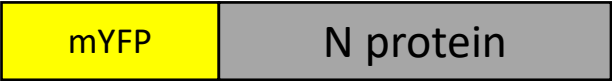

Turquoise-N

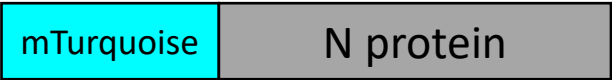

Supplement: s1 [file s1]
